# Supplementary material for: Mutations in cell elongation genes mreB, mrdA and mrdB suppress the shape defect of RodZ-deficient cells
Source: PubMed Central journal article supplement (PMC3599482; doi:10.1111/mmi.12148), 2013-01-21
Supplement: mmi0087-1029-SD1.pdf [file mmi0087-1029-SD1.pdf]

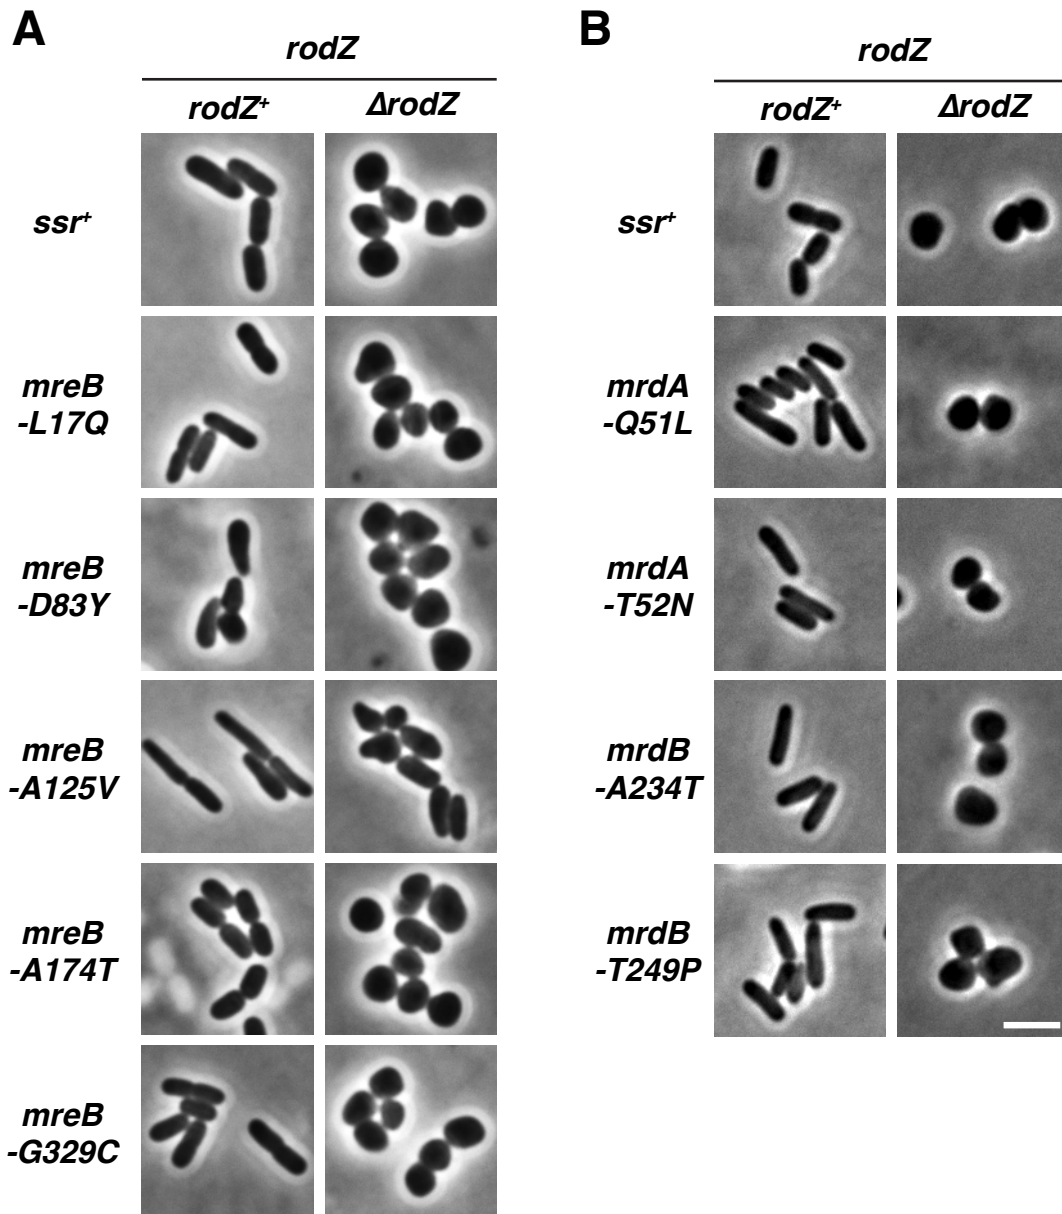

Supplementary Figure S1 Shiomi et al,

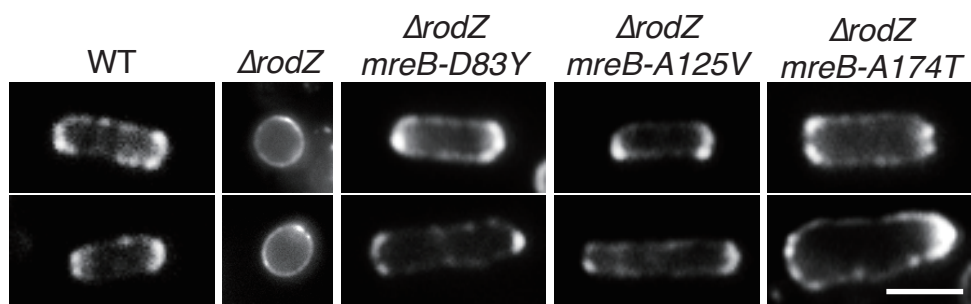

**Supplementary Figure S2 Shiomi et al,**

CLUSTAL 2.0.12 multiple sequence alignment

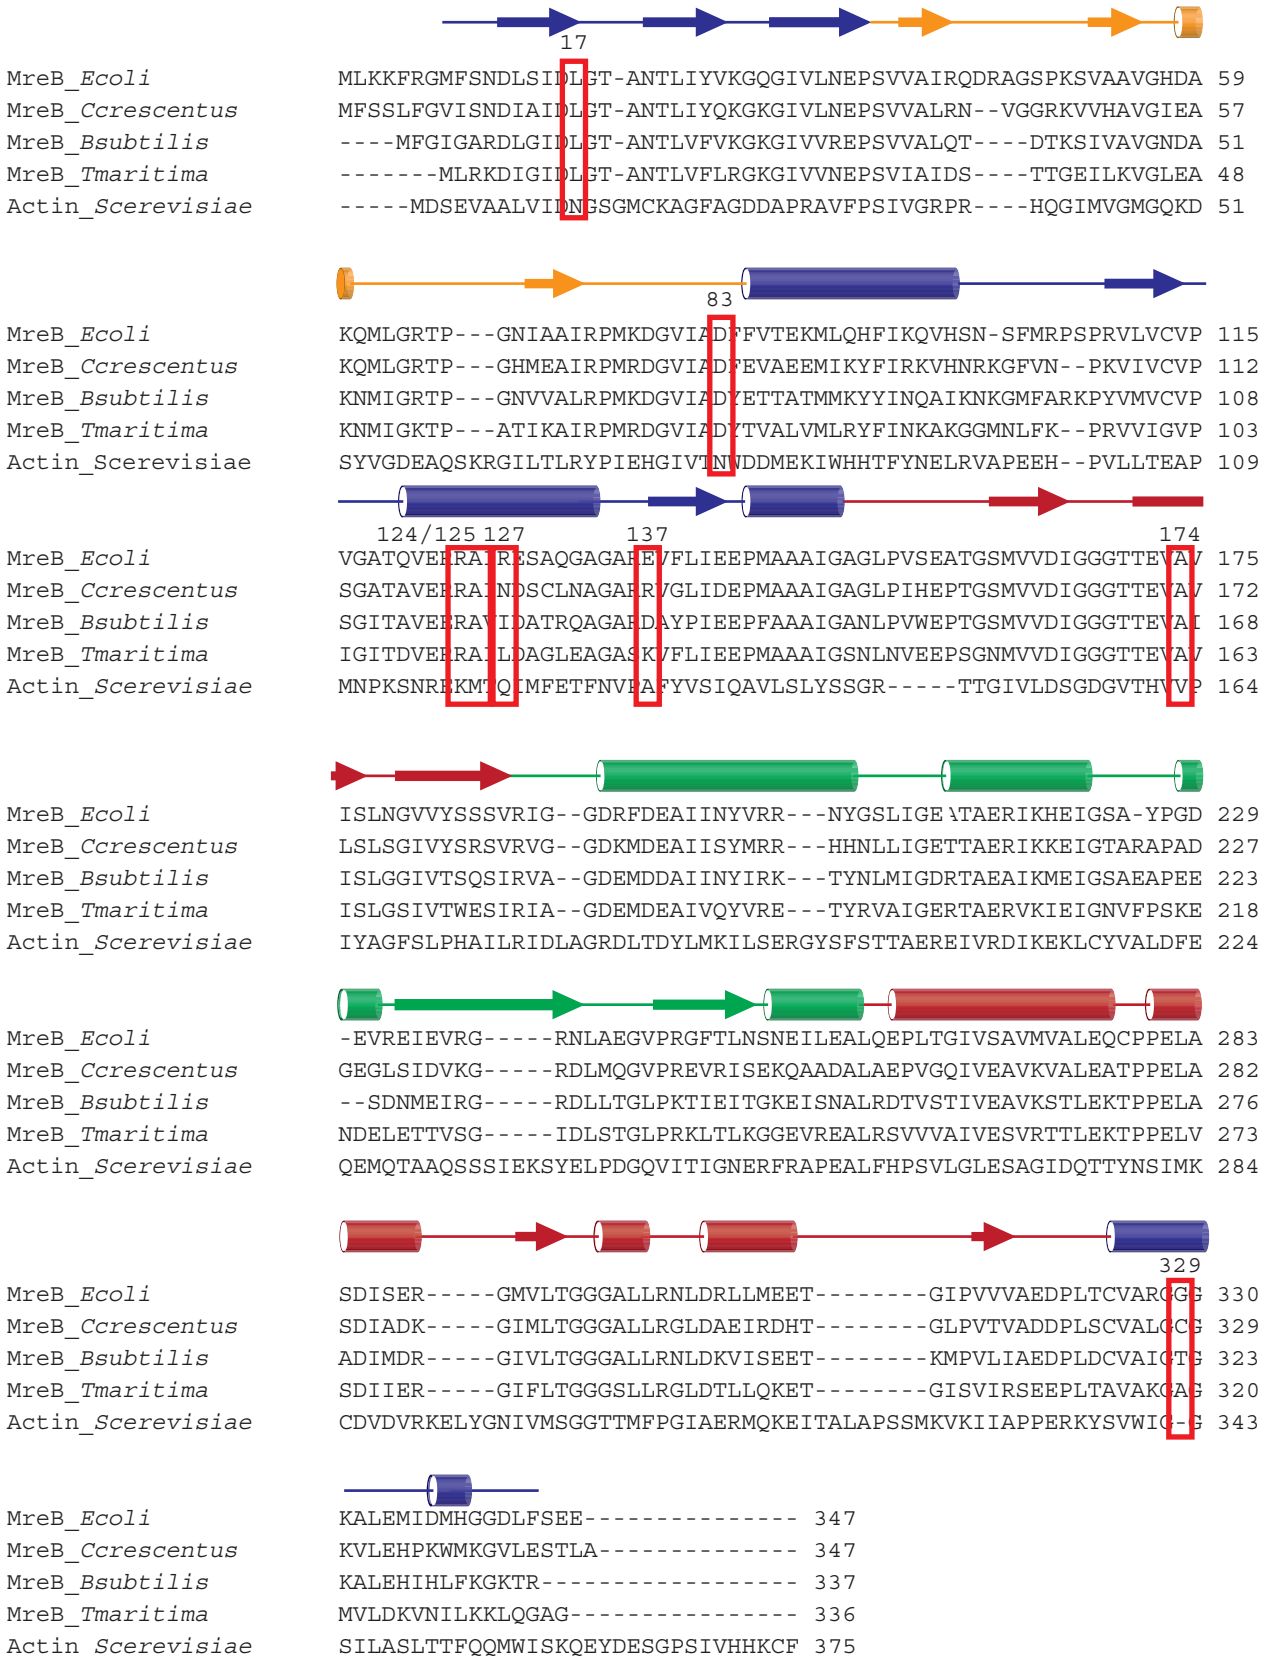

Supplementary Figure S3 Shiomi et al,

**A**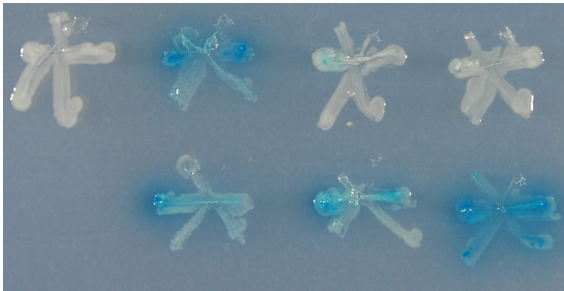

T25- none    *mreC*    *mreC*    *mreC*  
 T18- none    *mreB*    *mreB-L17Q*    *mreB-D83Y*

*mreC*    *mreC*    *mreC*  
*mreB-A125V*    *mreB-A174T*    *mreB-G329C*

**B**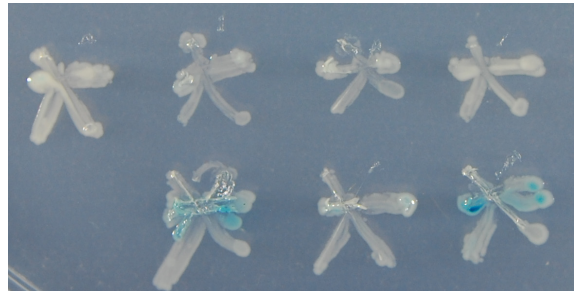

none    *mreB*    *mreB-L17Q*    *mreB-D83Y*  
 none    *mreC*    *mreC*    *mreC*

*mreB-A125V*    *mreB-A174T*    *mreB-G329C*  
*mreC*    *mreC*    *mreC*

## Supplementary Figure S4 Shiomi et al,



**A**

51/52

|                               |                                   |                                         |    |
|-------------------------------|-----------------------------------|-----------------------------------------|----|
| <i>PBP2_Ecoli</i>             | LVAFLGILLLTGVLIANLYNLQIVRFTDYQ    | TRSNENRIKLVPIAPSRGIIYDRNGIPLALNRTIYQIEM | 90 |
| <i>CCNA_01615_Ccrescentus</i> | FLLGGLTGLGLLTLGGRLAQLQLVEAQRVQ    | LSAGNQFNRYLVPPRGLIMDRNGVSLASNRPNFRLMI   | 91 |
| <i>TM0590_Tmaritima</i>       | RLILILMALSFVLIIMKAFVQVQILEHEKHKKY | IDLLQTRLVKIPAPRGKIISDQKVLAKDEVVYVLDP    | 72 |
| <i>SpoVD_Bsubtilis</i>        | LFVLLFGVIVFLIIDTRLGYVQFVMGEKLT    | SLAKDSWSRNLPFEPERGEILDRNGVKLATNKSAPTFFV | 81 |

**TM1** **Dimerization domain**

**B**

|                         |                                        |                                 |                       |     |
|-------------------------|----------------------------------------|---------------------------------|-----------------------|-----|
|                         |                                        | 234                             | 249                   |     |
| <i>RodA_Ecoli</i>       | PILWFFLM-----HDYQRQVRVMMLLDPE---       | SDPLGAGYHIIQSKIAIGSGGLRGKGLHGTQ | SQLEFLPERHTDFIFAVL    | 268 |
| <i>RodA_Crescentus</i>  | PPFVMFVL-----HDYQRHRVMTFLNPE---        | ADPSGKGYQIVQSKIALGSGGLLGKGFGLGS | SQLNFLPEKQTDIFATL     | 278 |
| <i>TM0839_Tmaritima</i> | PVFFFFGL-----KDYQRARILSFLNPE---        | EYGESYSYNVLQSIHAIGAGGLFGAGYMKK  | KANLMGYVVPVSYTDFIVSVI | 239 |
| <i>SpoVE_Bsubtilis</i>  | SLILLVMINFPDVAKSVGIQDYQIKRVTSWVSASNETQ | EDSNDSWQVDQAIMAIGSGGILGN---     | GISNLKVYVPESTDFIFSII  | 286 |

**TM6** **Periplasmic domain** **TM7**

**Supplementary Figure S5 Shiomi et al,**

**A** antiparallel

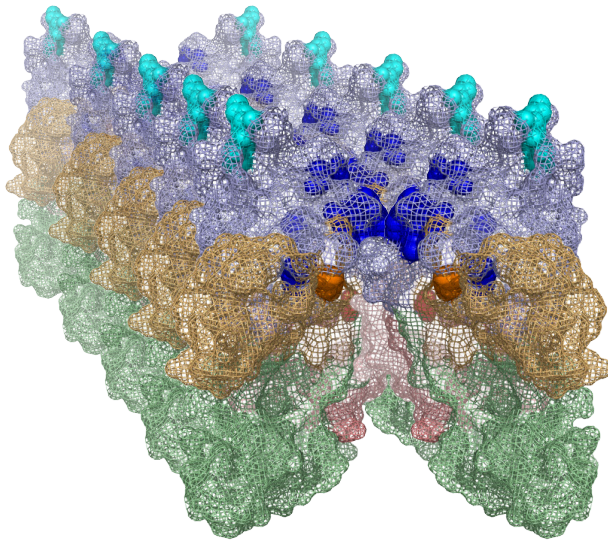

Cytoplasmic membrane

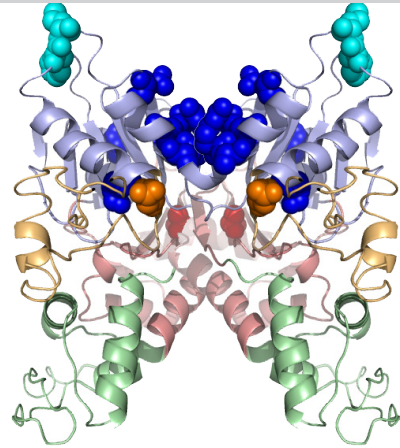

**B** parallel

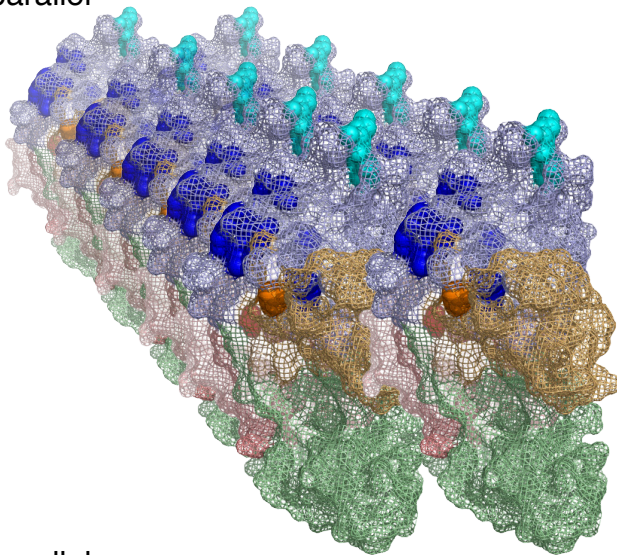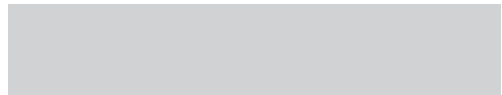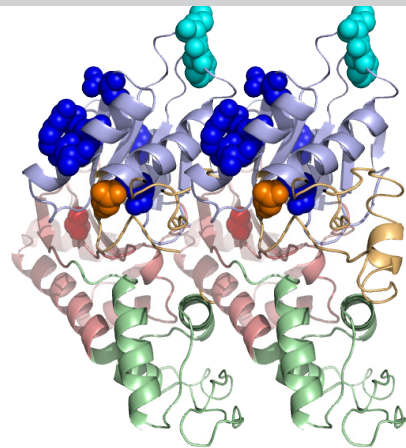

**C** parallel

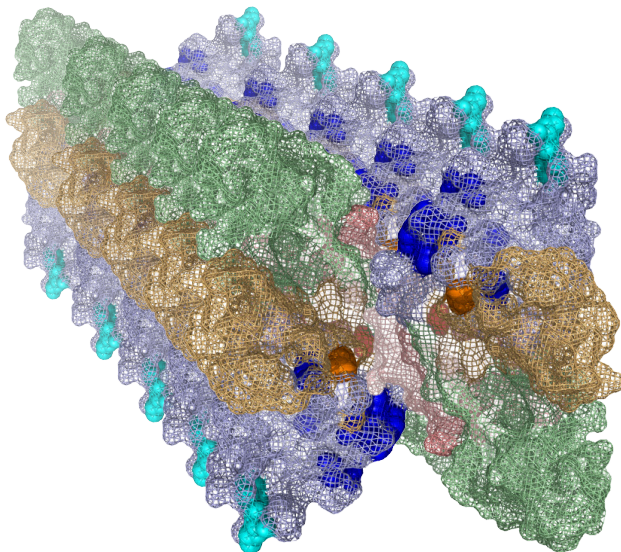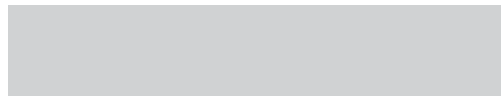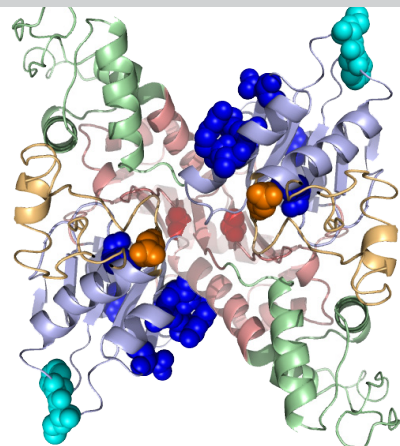

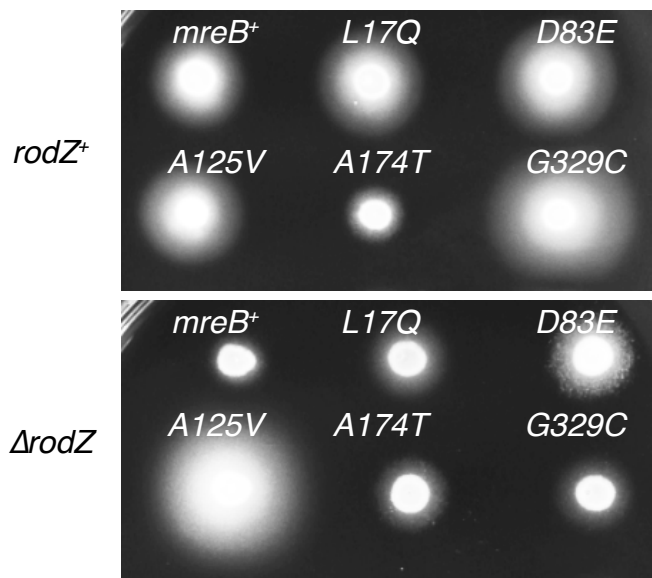

Supplementary Figure S7 Shiomi et al,

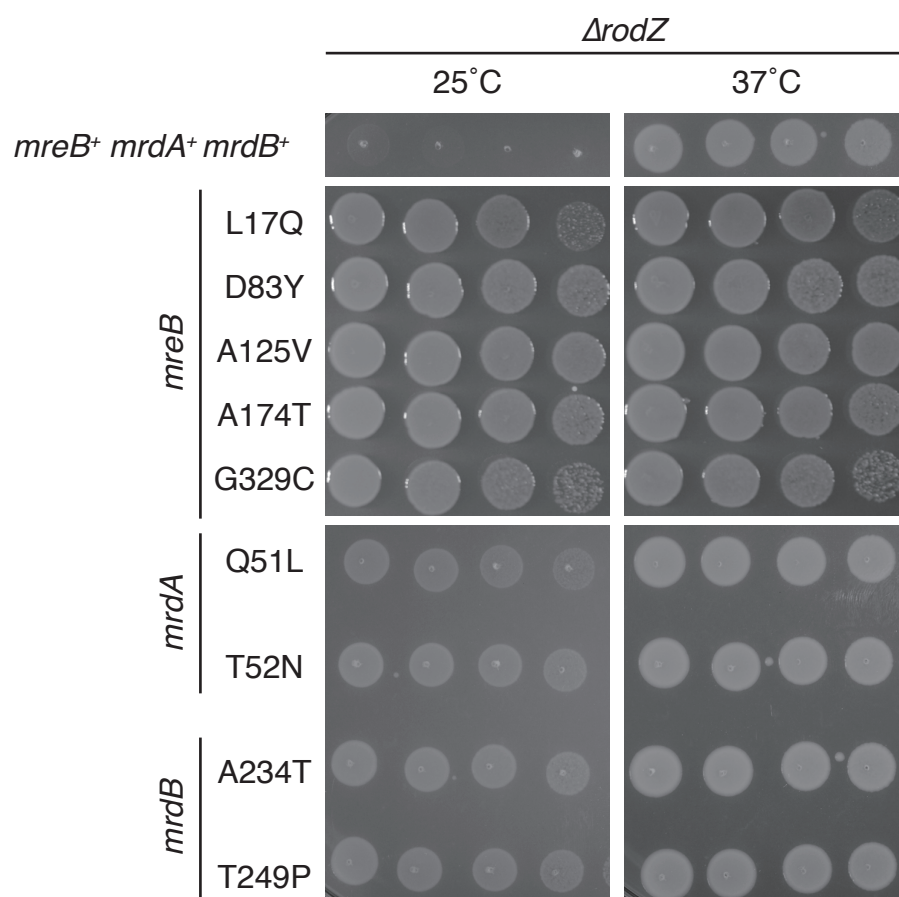

**Supplementary Figure S8 Shiomi et al,**

1 **Legends to Supplementary Figures**

2 **Figure S1. Morphology of *rodZ*<sup>+</sup> or  $\Delta rodZ$  cells producing MreB, PBP2, or**  
3 **RodA mutants grown in minimal medium. *rodZ*<sup>+</sup> (left) or  $\Delta rodZ$  (right)**  
4 carrying *mreB* (A) or *mrdA* or *mrdB* (B) mutation were grown in M9 medium  
5 containing 0.25% glucose at 37°C to log phase. Scale bar is 2.5  $\mu$ m.

6

7 **Figure S2. Localization of Tar-GFP in *rodZ* mutant cells**

8 Localization of Tar-GFP in WT, *rodZ* mutant, or *rodZ* mutant cells producing  
9 MreB-D83Y, MreB-A125V, or MreB-A174T. Cells were grown in L broth at 37°C  
10 to log phase. Scale bar is 2.5  $\mu$ m.

11

12 **Figure S3. Alignment of MreB from *E. coli*, *C. crescentus*, *B. subtilis*, *T.***  
13 ***Maritima*, and actin from *S. cerevisiae*.** Suppressor mutation sites are  
14 highlighted by red boxes. Secondary structures are shown according to the  
15 three-dimensional structure of *T. Maritima* MreB (PDB, 1JCE). Helix and strand  
16 colors refer to the domain colors in Figure 4. The alignment was prepared by  
17 ClustalW.

18

19 **Figure S4. Interaction between MreB and MreC.** BTH101 cells producing  
20 T25-MreC fusion and T18-MreB fusion (A) or T25-MreB fusion and T18-MreC  
21 fusion (B) were streaked on P-plates containing X-gal. The plates were  
22 incubated at 30°C for 48 h.

1 **Figure S5. Alignments of PBP2 (A) and RodA (B) from *E. coli*, *C.***  
2 ***crencentus*, *B. subtilis*, and *T. maritima*.** The alignments were prepared by  
3 ClustalW. (A) Red box indicates mutation sites (Q51 and T52). The first  
4 transmembrane (TM1) and dimerization domain are highlighted in gray. (B) Red  
5 boxes indicate mutation sites (A234 and T249). TM6 and TM7 are indicated in  
6 gray.

7

8 **Figure S6. Models for filaments of a three-dimensional structural model of**  
9 ***E. coli* MreB.** Three types of MreB-filaments are proposed by Salje et al.,  
10 (2011): pairs of antiparallel protofilaments (A), sheets of parallel protofilaments  
11 (B), and pairs of parallel protofilaments (C). MreB filaments are shown at left,  
12 and two MreB molecules from different protofilaments are shown at right.  
13 Suppressor mutation sites are shown as in Figure 4. Membrane insertion  
14 residues are shown by cyan spheres. The cytoplasmic membrane is shown in  
15 gray.

16

17 **Figure S7. Swarming abilities of *mreB* mutants.** 2  $\mu$ l of an overnight culture  
18 of the indicated strains were spotted onto tryptone swarming plates (1% bacto  
19 tryptone, 0.5% NaCl, 0.3% agar). The plates were incubated at 33°C for 6 h (for  
20 *rodZ*<sup>+</sup>) or for 12 h (for  $\Delta$ *rodZ*).

21

22 **Figure S8. *Ssr* mutations suppress the cold-sensitive growth of the *rodZ***  
23 **mutant.** An overnight culture of the indicated strains was diluted serially (from

- 1  $10^{-1}$  to  $10^{-4}$ ) and spotted onto L plates. The plates were incubated at 25°C for 48
- 2 h or at 37°C for 24 h.

**Table S1.** Strains used in this study.

| Strain  | Description                                                   | Reference/ Source                                        |
|---------|---------------------------------------------------------------|----------------------------------------------------------|
| BW25113 | <i>rrnB ΔlacZ4787 HsdR514 Δ(araBAD)567 Δ(rhaBAD)568 rph-1</i> | (Datsenko & Wanner, 2000)                                |
| DS6     | Same as BW25113 but <i>ΔrodZ::kan</i>                         | (Baba <i>et al.</i> , 2006, Shiomi <i>et al.</i> , 2008) |
| DS290   | Same as BW25113 but <i>ΔrodZ::kan</i>                         | This study                                               |
| DS452   | Same as BW25113 but <i>ΔyhdE::cat</i>                         | This study                                               |
| DS454   | Same as BW25113 but <i>ΔrodZ::kan ΔyhdE::cat</i>              | This study                                               |
| DS453   | Same as BW25113 but <i>ΔyhdE::cat mreB-L17Q</i>               | This study                                               |
| DS455   | Same as BW25113 but <i>ΔrodZ::kan ΔyhdE::cat mreB-L17Q</i>    | This study                                               |
| DS552   | Same as BW25113 but <i>ΔyhdE::cat mreB-D83Y</i>               | This study                                               |
| DS629   | Same as BW25113 but <i>ΔrodZ::kan ΔyhdE::cat mreB-D83Y</i>    | This study                                               |
| DS1155  | Same as BW25113 but <i>ΔyhdE::cat mreB-D83E</i>               | This study                                               |
| DS1156  | Same as BW25113 but <i>ΔrodZ::kan ΔyhdE::cat mreB-D83E</i>    | This study                                               |
| DS1159  | Same as BW25113 but <i>ΔyhdE::cat mreB-R124C</i>              | This study                                               |
| DS1160  | Same as BW25113 but <i>ΔrodZ::kan ΔyhdE::cat mreB-R124C</i>   | This study                                               |
| DS1157  | Same as BW25113 but <i>ΔyhdE::cat mreB-R124S</i>              | This study                                               |
| DS1158  | Same as BW25113 but <i>ΔrodZ::kan ΔyhdE::cat mreB-R124S</i>   | This study                                               |



|        |                                                             |            |
|--------|-------------------------------------------------------------|------------|
| DS612  | Same as BW25113 but <i>ΔyhdE::cat mreB-A125V</i>            | This study |
| DS630  | Same as BW25113 but <i>ΔrodZ::kan ΔyhdE::cat mreB-A125V</i> | This study |
| DS1165 | Same as BW25113 but <i>ΔyhdE::cat mreB-R127H</i>            | This study |
| DS1166 | Same as BW25113 but <i>ΔrodZ::kan ΔyhdE::cat mreB-R127H</i> | This study |
| DS1171 | Same as BW25113 but <i>ΔyhdE::cat mreB-E137A</i>            | This study |
| DS1172 | Same as BW25113 but <i>ΔrodZ::kan ΔyhdE::cat mreB-E137A</i> | This study |
| DS559  | Same as BW25113 but <i>ΔyhdE::cat mreB-A174T</i>            | This study |
| DS560  | Same as BW25113 but <i>ΔrodZ::kan ΔyhdE::cat mreB-A174T</i> | This study |
| DS553  | Same as BW25113 but <i>ΔyhdE::cat mreB-G329C</i>            | This study |
| DS561  | Same as BW25113 but <i>ΔrodZ::kan ΔyhdE::cat mreB-G329C</i> | This study |
| DS673  | Same as BW25113 but <i>ΔrlpA::cat</i>                       | This study |
| DS674  | Same as BW25113 but <i>ΔrodZ::kan ΔrlpA::cat</i>            | This study |
| DS684  | Same as BW25113 but <i>ΔrlpA::cat mrdA-Q51L</i>             | This study |
| DS688  | Same as BW25113 but <i>ΔrodZ::kan ΔrlpA::cat mrdA-Q51L</i>  | This study |
| DS685  | Same as BW25113 but <i>ΔrlpA::cat mrdA-T52N</i>             | This study |
| DS689  | Same as BW25113 but <i>ΔrodZ::kan ΔrlpA::cat mrdA-T52N</i>  | This study |
| DS686  | Same as BW25113 but <i>ΔrlpA::cat mrdB-A234T</i>            | This study |
| DS690  | Same as BW25113 but <i>ΔrodZ::kan ΔrlpA::cat mrdB-A234T</i> | This study |

|        |                                                                                          |                                 |
|--------|------------------------------------------------------------------------------------------|---------------------------------|
| DS687  | Same as BW25113 but <i>ΔrlpA::cat mrdB-AT249P</i>                                        | This study                      |
| DS691  | Same as BW25113 but <i>ΔrodZ::kan ΔrlpA::cat mrdB-AT249P</i>                             | This study                      |
| DS797  | Same as BW25113 but <i>ΔrlpA</i>                                                         | This study                      |
| DS798  | Same as BW25113 but <i>ΔrlpA mrdA-Q51L</i>                                               | This study                      |
| DS799  | Same as BW25113 but <i>ΔrlpA mrdB-A234T</i>                                              | This study                      |
| DS1324 | Same as BW25113 but <i>ΔrlpA mrdA-T52N</i>                                               | This study                      |
| DS1325 | Same as BW25113 but <i>ΔrlpA mrdB-T249P</i>                                              | This study                      |
| KRX    | For overproduction of His <sub>6</sub> -MreB and His <sub>6</sub> -RodZ <sub>1-111</sub> | Promega                         |
| AH109  | yeast strain for yeast two-hybrid assay                                                  | Clontech                        |
| BTH101 | <i>Δcya</i> strain for bacterial two-hybrid assay                                        | (Karimova <i>et al.</i> , 1998) |

---

**Table S2.** Plasmids used in this study.

| Plasmid | Description                                                         | Reference/ Source |
|---------|---------------------------------------------------------------------|-------------------|
| pET28a  | vector to express a his <sub>6</sub> tagged protein                 | Novagen           |
| pDS725  | <i>his<sub>6</sub>-mreB</i> in pET28a <sup>*1</sup>                 | This study        |
| pGADT7  | vector to express a fusion protein with the GAL4 activation domain  | Clontech          |
| pGBKT7  | vector to express a fusion protein with the GAL4 DNA-binding domain | Clontech          |
| pDS919  | <i>mreB</i> in pGADT7 <sup>*2</sup>                                 | This study        |
| pDS1020 | <i>mreB-L17Q</i> in pGADT7 <sup>*2</sup>                            | This study        |
| pDS1021 | <i>mreB-D83Y</i> in pGADT7 <sup>*2</sup>                            | This study        |
| pDS920  | <i>mreB-A125V</i> in pGADT7 <sup>*2</sup>                           | This study        |
| pDS921  | <i>mreB-A174T</i> in pGADT7 <sup>*2</sup>                           | This study        |
| pDS1022 | <i>mreB-G329C</i> in pGADT7 <sup>*2</sup>                           | This study        |
| pDS922  | <i>mreB</i> in pGBKT7 <sup>*2</sup>                                 | This study        |
| pDS1023 | <i>mreB-L17Q</i> in pGBKT7 <sup>*2</sup>                            | This study        |
| pDS1024 | <i>mreB-D83Y</i> in pGBKT7 <sup>*2</sup>                            | This study        |
| pDS923  | <i>mreB-A125V</i> in pGBKT7 <sup>*2</sup>                           | This study        |
| pDS924  | <i>mreB-A174T</i> in pGBKT7 <sup>*2</sup>                           | This study        |

|         |                                                                                 |                      |
|---------|---------------------------------------------------------------------------------|----------------------|
| pDS1025 | <i>mreB-G329C</i> in pGBKT7 <sup>*2</sup>                                       | This study           |
| pT25    | vector to express a fusion protein with the T25(Karimova et al., 1998) fragment |                      |
| pKT25   | vector to express a fusion protein with the T25(Karimova et al., 1998) fragment |                      |
| pUT18C  | vector to express a fusion protein with the T18(Karimova et al., 1998) fragment |                      |
| pDS1289 | <i>T25-mreB</i> in pKT25 <sup>*3</sup>                                          | This study           |
| pDS1290 | <i>T25-mreB-L17Q</i> in pKT25 <sup>*3</sup>                                     | This study           |
| pDS1291 | <i>T25-mreB-D83Y</i> in pKT25 <sup>*3</sup>                                     | This study           |
| pDS1295 | <i>T25-mreB-A125V</i> in pKT25 <sup>*3</sup>                                    | This study           |
| pDS1298 | <i>T25-mreB-A174T</i> in pKT25 <sup>*3</sup>                                    | This study           |
| pDS1299 | <i>T25-mreB-G329C</i> in pKT25 <sup>*3</sup>                                    | This study           |
| pDS1300 | <i>T18-mreB</i> in pUT18C <sup>*3</sup>                                         | This study           |
| pDS1301 | <i>T18-mreB-L17Q</i> in pUT18C <sup>*3</sup>                                    | This study           |
| pDS1302 | <i>T18-mreB-D83Y</i> in pUT18C <sup>*3</sup>                                    | This study           |
| pDS1306 | <i>T18-mreB-A125V</i> in pUT18C <sup>*3</sup>                                   | This study           |
| pDS1309 | <i>T18-mreB-A174T</i> in pUT18C <sup>*3</sup>                                   | This study           |
| pDS1310 | <i>T18-mreB-G329C</i> in pUT18C <sup>*3</sup>                                   | This study           |
| pTK560  | <i>T25-mreC</i> in pT25                                                         | (Kruse et al., 2005) |

|                |                           |                       |
|----------------|---------------------------|-----------------------|
| pTK566         | <i>T18-mreC</i> in pUT18C | (Kruse et al., 2005)  |
| pDS176         | <i>gfp-mreB</i>           | (Shiomi et al., 2008) |
| pLC113-Tar-GFP | <i>tar-gfp</i>            | (Shiomi et al., 2006) |

---

<sup>\*1</sup> *mreB* was cloned as a *SacI-HindIII* fragment into pET28a.

<sup>\*2</sup> *mreB* genes were cloned as *NdeI-BamHI* fragments into pGADT7 or pGBKT7.

<sup>\*3</sup> *mreB* genes were cloned as *BamHI-EcoRI* fragments into pKT25 or pUT18C.

## References to Supplementary Tables

- Baba, T., T. Ara, M. Hasegawa, Y. Takai, Y. Okumura, M. Baba, K. A. Datsenko, M. Tomita, B. L. Wanner & H. Mori, (2006) Construction of Escherichia coli K-12 in-frame, single-gene knockout mutants: the Keio collection. *Mol Syst Biol* **2**: 20060008.
- Datsenko, K. A. & B. L. Wanner, (2000) One-step inactivation of chromosomal genes in Escherichia coli K-12 using PCR products. *Proc Natl Acad Sci U S A* **97**: 6640-6645.
- Karimova, G., J. Pidoux, A. Ullmann & D. Ladant, (1998) A bacterial two-hybrid system based on a reconstituted signal transduction pathway *Proc Natl Acad Sci U S A* **95**: 5752-5756.
- Kruse, T., J. Bork-Jensen & K. Gerdes, (2005) The morphogenetic MreBCD proteins of Escherichia coli form an essential membrane-bound complex. *Mol Microbiol* **55**: 78-89.
- Shiomi, D., M. Sakai & H. Niki, (2008) Determination of bacterial rod shape by a novel cytoskeletal membrane protein. *Embo J* **27**: 3081-3091.
- Shiomi, D., M. Yoshimoto, M. Homma & I. Kawagishi, (2006) Helical distribution of the bacterial chemoreceptor via colocalization with the Sec protein translocation machinery *Mol Microbiol* **60**: 894-906.
